# Supplementary material for: Estimating variation within the genes and inferring the phylogeny of 186 sequenced diverse Escherichia coli genomes
Source: PubMed Central journal article supplement (PMC3575317; doi:10.1186/1471-2164-13-577), 2012-10-31
Supplement: 1471-2164-13-577-S7.pdf [file 1471-2164-13-577-S7.pdf]

| GPID  | Name                                      | Status   | Contigs | Ns   | Plasmids | GB genes | Prodigal genes | 16S rRNA | Length  | AT content | tRNA | MLST    |
|-------|-------------------------------------------|----------|---------|------|----------|----------|----------------|----------|---------|------------|------|---------|
| 30681 | Escherichia coli 'BL21-Gold(DE3)pLysS AG' | complete | 1       | 0    | 0        | 4228     | 4299           | 7        | 4570938 | 49,16      | 85   | ST-93   |
| 40647 | Escherichia coli 042                      | complete | 1       | 0    | 1        | 5038     | 5054           | 7        | 5355323 | 49,46      | 92   | ST-414  |
| 16235 | Escherichia coli 536                      | complete | 1       | 0    | 0        | 4685     | 4543           | 7        | 4938920 | 49,48      | 80   | ST-127  |
| 33413 | Escherichia coli 55989                    | complete | 1       | 0    | 0        | 4919     | 4845           | 7        | 5154862 | 49,34      | 93   | ST-678  |
| 38725 | Escherichia coli ABU 83972                | complete | 1       | 1    | 1        | 4796     | 4741           | 7        | 5132961 | 49,42      | 88   | ST-73   |
| 16718 | Escherichia coli APEC O1                  | complete | 1       | 1    | 2        | 4890     | 5259           | 7        | 5497653 | 49,66      | 95   | ST-95   |
| 18083 | Escherichia coli ATCC 8739                | complete | 1       | 0    | 0        | 4200     | 4393           | 7        | 4746218 | 49,13      | 86   | Unknown |
| 18281 | Escherichia coli B str. REL606            | complete | 1       | 0    | 0        | 4209     | 4321           | 7        | 4629812 | 49,23      | 85   | ST-93   |
| 20713 | Escherichia coli BL21(DE3)                | complete | 1       | 0    | 0        | 4159     | 4272           | 7        | 4558953 | 49,17      | 85   | ST-93   |
| 28965 | Escherichia coli BL21(DE3)                | complete | 1       | 0    | 0        | 4319     | 4272           | 7        | 4558947 | 49,17      | 85   | ST-93   |
| 33775 | Escherichia coli BW2952                   | complete | 1       | 0    | 0        | 4084     | 4280           | 7        | 4578159 | 49,21      | 86   | ST-10   |
| 313   | Escherichia coli CFT073                   | complete | 1       | 87   | 0        | 5379     | 4902           | 7        | 5231428 | 49,52      | 88   | ST-73   |
| 30031 | Escherichia coli DH1                      | complete | 1       | 0    | 0        | 4160     | 4309           | 7        | 4630707 | 49,19      | 87   | ST-1060 |
| 13960 | Escherichia coli E24377A                  | complete | 1       | 0    | 6        | 4989     | 5005           | 7        | 5246055 | 49,44      | 88   | ST-1132 |
| 33409 | Escherichia coli ED1a                     | complete | 1       | 100  | 0        | 5123     | 4987           | 7        | 5209548 | 49,27      | 89   | ST-452  |
| 42749 | Escherichia coli ETEC H10407              | complete | 1       | 0    | 0        | 4763     | 4924           | 7        | 5153435 | 49,24      | 89   | ST-48   |
| 13959 | Escherichia coli HS                       | complete | 1       | 0    | 0        | 4384     | 4323           | 7        | 4643538 | 49,18      | 87   | ST-46   |
| 33373 | Escherichia coli IAI1                     | complete | 1       | 0    | 0        | 4443     | 4328           | 7        | 4700560 | 49,21      | 85   | ST-1128 |
| 33411 | Escherichia coli IAI39                    | complete | 1       | 0    | 0        | 4892     | 4862           | 7        | 5132068 | 49,37      | 87   | ST-62   |
| 43693 | Escherichia coli IHE3034                  | complete | 1       | 0    | 0        | 4757     | 4816           | 7        | 5108383 | 49,30      | 96   | ST-95   |
| 33875 | Escherichia coli KO11                     | complete | 1       | 0    | 2        | 4653     | 4722           | 7        | 5029323 | 49,19      | 85   | ST-1079 |
| 32511 | Escherichia coli O103:H2 str. 12009       | complete | 1       | 0    | 1        | 5354     | 5338           | 7        | 5524860 | 49,37      | 97   | ST-17   |
| 32513 | Escherichia coli O111:H- str. 11128       | complete | 1       | 0    | 5        | 5732     | 5690           | 7        | 5766081 | 49,56      | 110  | ST-16   |
| 32571 | Escherichia coli O127:H6 str. E2348/69    | complete | 1       | 0    | 2        | 4824     | 4873           | 7        | 5069678 | 49,48      | 90   | ST-15   |
| 27739 | Escherichia coli O157:H7 str. EC4115      | complete | 1       | 0    | 2        | 5477     | 5548           | 7        | 5704171 | 49,59      | 108  | ST-11   |
| 259   | Escherichia coli O157:H7 str. EDL933      | complete | 1       | 4228 | 1        | 5449     | 5420           | 7        | 5620522 | 49,54      | 99   | ST-11*  |
| 226   | Escherichia coli O157:H7 str. Sakai       | complete | 1       | 0    | 2        | 5447     | 5398           | 7        | 5594477 | 49,52      | 102  | ST-11   |
| 30045 | Escherichia coli O157:H7 str. TW14359     | complete | 1       | 0    | 1        | 5373     | 5444           | 7        | 5622737 | 49,54      | 107  | ST-11   |
| 32509 | Escherichia coli O26:H11 str. 11368       | complete | 1       | 0    | 4        | 5795     | 5771           | 7        | 5855531 | 49,35      | 100  | ST-21   |
| 42729 | Escherichia coli O55:H7 str. CB9615       | complete | 1       | 0    | 1        | 5121     | 5151           | 7        | 5452353 | 49,50      | 99   | ST-335  |

|       |                                                  |          |     |    |   |      |      |   |         |       |     |          |
|-------|--------------------------------------------------|----------|-----|----|---|------|------|---|---------|-------|-----|----------|
| 41221 | <i>Escherichia coli</i> O83:H1 str. NRG 857C     | complete | 1   | 0  | 1 | 4582 | 4542 | 7 | 4894879 | 49,31 | 83  | ST-135   |
| 33375 | <i>Escherichia coli</i> S88                      | complete | 1   | 0  | 1 | 4991 | 4887 | 7 | 5166121 | 49,35 | 90  | ST-95    |
| 18057 | <i>Escherichia coli</i> SE11                     | complete | 1   | 0  | 6 | 5002 | 4895 | 7 | 5155626 | 49,26 | 87  | ST-156   |
| 19053 | <i>Escherichia coli</i> SE15                     | complete | 1   | 0  | 1 | 4488 | 4448 | 7 | 4839683 | 49,25 | 85  | ST-131   |
| 19469 | <i>Escherichia coli</i> SMS-3-5                  | complete | 1   | 0  | 4 | 4913 | 4822 | 7 | 5215377 | 49,51 | 89  | ST-354   |
| 20079 | <i>Escherichia coli</i> str. K-12 substr. DH10B  | complete | 1   | 0  | 0 | 4200 | 4398 | 7 | 4686137 | 49,22 | 87  | ST-1060  |
| 225   | <i>Escherichia coli</i> str. K-12 substr. MG1655 | complete | 1   | 0  | 0 | 4319 | 4313 | 7 | 4639675 | 49,21 | 87  | ST-10    |
| 16351 | <i>Escherichia coli</i> str. K-12 substr. W3110  | complete | 1   | 0  | 0 | 4337 | 4326 | 7 | 4646332 | 49,20 | 87  | ST-10    |
| 50883 | <i>Escherichia coli</i> UM146                    | complete | 1   | 8  | 1 | 4783 | 4804 | 7 | 5107563 | 49,40 | 84  | ST-643   |
| 33415 | <i>Escherichia coli</i> UMN026                   | complete | 1   | 53 | 2 | 5107 | 5021 | 7 | 5358200 | 49,34 | 87  | ST-597   |
| 16259 | <i>Escherichia coli</i> UTI89                    | complete | 1   | 0  | 1 | 5211 | 4839 | 7 | 5179971 | 49,39 | 88  | ST-95    |
| 48011 | <i>Escherichia coli</i> W                        | complete | 1   | 1  | 2 | 4700 | 4705 | 7 | 5008864 | 49,18 | 87  | ST-1079  |
| 15637 | <i>Shigella boydii</i> CDC 3083-94               | complete | 1   | 0  | 5 | 4557 | 5121 | 7 | 4874659 | 48,97 | 98  | ST-1129  |
| 13146 | <i>Shigella boydii</i> Sb227                     | complete | 1   | 0  | 1 | 4290 | 4822 | 7 | 4646520 | 48,89 | 91  | ST-1130  |
| 13145 | <i>Shigella dysenteriae</i> Sd197                | complete | 1   | 0  | 2 | 4508 | 5217 | 7 | 4560911 | 49,03 | 84  | ST-146   |
| 33639 | <i>Shigella flexneri</i> 2002017                 | complete | 1   | 1  | 5 | 4706 | 5091 | 7 | 4894492 | 49,39 | 102 | ST-245   |
| 408   | <i>Shigella flexneri</i> 2a str. 2457T           | complete | 1   | 1  | 0 | 4073 | 4720 | 7 | 4599354 | 49,09 | 100 | ST-245   |
| 310   | <i>Shigella flexneri</i> 2a str. 301             | complete | 1   | 6  | 1 | 4705 | 5006 | 7 | 4828821 | 49,35 | 97  | ST-245   |
| 16375 | <i>Shigella flexneri</i> 5 str. 8401             | complete | 1   | 0  | 0 | 4116 | 4680 | 7 | 4574284 | 49,08 | 97  | ST-634   |
| 13151 | <i>Shigella sonnei</i> Ss046                     | complete | 1   | 0  | 4 | 4476 | 5105 | 7 | 5055316 | 49,23 | 97  | ST-152   |
| 15630 | <i>Escherichia coli</i>                          | draft    | 262 | 0  | 1 | 4626 | 5579 | 0 | 5495385 | 49,56 | 75  | ST-3     |
| 51097 | <i>Escherichia coli</i> 1.2264                   | draft    | 86  | 8  | 0 | 0    | 5362 | 6 | 5498865 | 49,43 | 89  | ST-675   |
| 51085 | <i>Escherichia coli</i> 1.2741                   | draft    | 68  | 4  | 0 | 0    | 5532 | 7 | 5657864 | 49,71 | 100 | Unknown* |
| 16193 | <i>Escherichia coli</i> 101-1                    | draft    | 91  | 0  | 0 | 4205 | 4867 | 2 | 4979767 | 49,37 | 73  | Unknown  |
| 40289 | <i>Escherichia coli</i> 1180                     | draft    | 86  | 1  | 0 | 5772 | 5564 | 8 | 5554557 | 49,50 | 111 | ST-16    |
| 40291 | <i>Escherichia coli</i> 1357                     | draft    | 180 | 2  | 0 | 5230 | 5137 | 7 | 5277070 | 49,39 | 86  | Unknown  |
| 40257 | <i>Escherichia coli</i> 1827-70                  | draft    | 35  | 1  | 0 | 4707 | 4654 | 8 | 4803089 | 49,21 | 88  | ST-398   |
| 51123 | <i>Escherichia coli</i> 2.3916                   | draft    | 207 | 8  | 0 | 0    | 5758 | 9 | 5602529 | 49,36 | 103 | ST-10    |
| 51127 | <i>Escherichia coli</i> 2.4168                   | draft    | 27  | 3  | 0 | 0    | 4579 | 7 | 4757936 | 49,07 | 81  | ST-10    |
| 40275 | <i>Escherichia coli</i> 2362-75                  | draft    | 83  | 0  | 0 | 5220 | 5027 | 8 | 5173444 | 49,52 | 96  | ST-19    |
| 51129 | <i>Escherichia coli</i> 3.2303                   | draft    | 51  | 3  | 0 | 0    | 4810 | 7 | 4950291 | 49,54 | 91  | ST-10    |

|       |                               |       |     |    |   |      |      |    |         |       |     |          |
|-------|-------------------------------|-------|-----|----|---|------|------|----|---------|-------|-----|----------|
| 51131 | Escherichia coli 3003         | draft | 21  | 0  | 0 | 0    | 4709 | 8  | 4927221 | 49,32 | 90  | ST-725   |
| 40265 | Escherichia coli 3431         | draft | 127 | 3  | 0 | 5092 | 5189 | 6  | 5223419 | 49,07 | 89  | ST-378   |
| 51109 | Escherichia coli 4.0522       | draft | 125 | 6  | 0 | 0    | 5920 | 7  | 5830788 | 49,52 | 118 | ST-16    |
| 51121 | Escherichia coli 4.0967       | draft | 96  | 2  | 0 | 0    | 5958 | 7  | 5860313 | 49,66 | 94  | ST-20    |
| 51115 | Escherichia coli 5.0959       | draft | 79  | 6  | 0 | 0    | 5309 | 6  | 5370927 | 49,47 | 98  | ST-655   |
| 15639 | Escherichia coli 53638        | draft | 2   | 0  | 2 | 376  | 5287 | 7  | 5371790 | 49,01 | 102 | ST-6     |
| 31467 | Escherichia coli 83972        | draft | 159 | 6  | 0 | 5255 | 4803 | 1  | 5066014 | 49,43 | 72  | ST-73    |
| 51117 | Escherichia coli 9.1649       | draft | 33  | 0  | 0 | 0    | 4876 | 8  | 5102049 | 49,36 | 87  | ST-998   |
| 51137 | Escherichia coli 900105 (10e) | draft | 63  | 4  | 0 | 0    | 5552 | 7  | 5556164 | 49,41 | 102 | ST-21    |
| 51095 | Escherichia coli 95.0941      | draft | 47  | 0  | 0 | 0    | 4486 | 8  | 4786951 | 49,13 | 90  | ST-58    |
| 51087 | Escherichia coli 97.0246      | draft | 94  | 5  | 0 | 0    | 5561 | 11 | 5475907 | 49,40 | 107 | ST-342   |
| 51091 | Escherichia coli 97.0259      | draft | 76  | 4  | 0 | 0    | 5500 | 5  | 5445504 | 49,33 | 88  | ST-33    |
| 51099 | Escherichia coli 97.0264      | draft | 133 | 5  | 0 | 0    | 5048 | 5  | 5230651 | 49,38 | 87  | ST-58    |
| 51103 | Escherichia coli 99.0741      | draft | 40  | 5  | 0 | 0    | 4899 | 7  | 5209988 | 49,48 | 88  | Unknown* |
| 38905 | Escherichia coli B088         | draft | 148 | 4  | 0 | 0    | 4715 | 1  | 4944201 | 49,48 | 77  | Unknown  |
| 38915 | Escherichia coli B185         | draft | 115 | 2  | 0 | 0    | 4755 | 1  | 5106858 | 49,40 | 83  | Unknown* |
| 38917 | Escherichia coli B354         | draft | 69  | 5  | 0 | 0    | 4474 | 1  | 4831934 | 49,45 | 76  | Unknown* |
| 51135 | Escherichia coli B41          | draft | 34  | 4  | 0 | 0    | 4843 | 8  | 5032803 | 49,28 | 87  | ST-10    |
| 15572 | Escherichia coli B7A          | draft | 289 | 0  | 0 | 4404 | 5277 | 2  | 5300242 | 49,31 | 64  | ST-94    |
| 15578 | Escherichia coli E110019      | draft | 137 | 0  | 0 | 4593 | 5323 | 4  | 5376211 | 49,28 | 69  | ST-381   |
| 38941 | Escherichia coli E1167        | draft | 87  | 9  | 0 | 4597 | 4706 | 1  | 4918295 | 49,28 | 70  | ST-1727  |
| 40269 | Escherichia coli E128010      | draft | 284 | 1  | 0 | 5385 | 5403 | 7  | 5221267 | 49,41 | 89  | ST-3     |
| 38945 | Escherichia coli E1520        | draft | 127 | 5  | 0 | 4613 | 4749 | 1  | 4896881 | 49,37 | 79  | ST-48    |
| 15577 | Escherichia coli E22          | draft | 127 | 0  | 0 | 4828 | 5418 | 6  | 5528238 | 49,37 | 75  | ST-20    |
| 38949 | Escherichia coli E482         | draft | 94  | 3  | 0 | 4528 | 4660 | 1  | 4833169 | 49,30 | 72  | ST-1288  |
| 61479 | Escherichia coli EC4100B      | draft | 42  | 19 | 0 | 4910 | 4971 | 3  | 5111899 | 49,49 | 87  | ST-1890  |
| 40267 | Escherichia coli EPECa14      | draft | 199 | 5  | 0 | 5844 | 5590 | 5  | 5435297 | 49,54 | 99  | ST-21    |
| 15576 | Escherichia coli F11          | draft | 119 | 0  | 0 | 4318 | 4925 | 7  | 5215961 | 49,51 | 73  | ST-127   |
| 39915 | Escherichia coli FVEC1302     | draft | 149 | 5  | 0 | 0    | 5155 | 1  | 5291786 | 49,37 | 73  | ST-69    |
| 39917 | Escherichia coli FVEC1412     | draft | 137 | 4  | 0 | 0    | 5021 | 1  | 5194603 | 49,30 | 70  | ST-69    |
| 38971 | Escherichia coli H120         | draft | 172 | 2  | 0 | 4866 | 4981 | 1  | 5044811 | 49,53 | 61  | ST-1125  |

|       |                           |       |     |    |   |      |      |   |         |       |     |          |
|-------|---------------------------|-------|-----|----|---|------|------|---|---------|-------|-----|----------|
| 38981 | Escherichia coli H252     | draft | 112 | 7  | 0 | 4996 | 5098 | 1 | 5260709 | 49,53 | 84  | ST-95    |
| 38985 | Escherichia coli H263     | draft | 165 | 18 | 0 | 5011 | 5008 | 1 | 5192679 | 49,50 | 78  | ST-95    |
| 38991 | Escherichia coli H299     | draft | 229 | 2  | 0 | 0    | 5098 | 1 | 5248906 | 49,25 | 85  | ST-117   |
| 39013 | Escherichia coli H489     | draft | 141 | 3  | 0 | 4622 | 4680 | 1 | 4832506 | 49,09 | 84  | ST-93    |
| 39021 | Escherichia coli H591     | draft | 190 | 9  | 0 | 0    | 4811 | 1 | 4918687 | 49,28 | 71  | ST-155   |
| 39033 | Escherichia coli H736     | draft | 135 | 6  | 0 | 0    | 4445 | 1 | 4652606 | 49,18 | 71  | ST-227   |
| 51111 | Escherichia coli JB1-95   | draft | 162 | 31 | 0 | 0    | 5497 | 6 | 5397192 | 49,52 | 95  | ST-294   |
| 40261 | Escherichia coli LT-68    | draft | 63  | 0  | 0 | 5567 | 5383 | 8 | 5189427 | 49,15 | 104 | ST-281*  |
| 39039 | Escherichia coli M605     | draft | 162 | 3  | 0 | 0    | 5340 | 1 | 5446689 | 49,57 | 75  | ST-1876  |
| 39043 | Escherichia coli M718     | draft | 188 | 6  | 0 | 0    | 5127 | 1 | 5365946 | 49,43 | 74  | ST-57    |
| 39045 | Escherichia coli M863     | draft | 152 | 6  | 0 | 4953 | 5055 | 1 | 5250401 | 49,76 | 76  | Unknown* |
| 40713 | Escherichia coli MS 107-1 | draft | 72  | 0  | 0 | 4625 | 4638 | 3 | 4905150 | 49,41 | 80  | ST-101   |
| 47225 | Escherichia coli MS 110-3 | draft | 411 | 0  | 0 | 5415 | 4841 | 1 | 5063123 | 49,50 | 64  | ST-95    |
| 47227 | Escherichia coli MS 115-1 | draft | 423 | 0  | 0 | 5020 | 4594 | 1 | 4797820 | 49,24 | 63  | ST-399   |
| 47229 | Escherichia coli MS 116-1 | draft | 484 | 0  | 0 | 5158 | 4621 | 1 | 4840256 | 49,45 | 61  | ST-167   |
| 47231 | Escherichia coli MS 117-3 | draft | 467 | 0  | 0 | 5371 | 4900 | 0 | 5013840 | 49,47 | 65  | ST-156   |
| 40709 | Escherichia coli MS 119-7 | draft | 130 | 0  | 0 | 5071 | 4814 | 2 | 4968686 | 49,25 | 86  | ST-155   |
| 40707 | Escherichia coli MS 124-1 | draft | 176 | 0  | 0 | 5668 | 5293 | 1 | 5394127 | 49,41 | 77  | ST-88    |
| 40703 | Escherichia coli MS 145-7 | draft | 143 | 0  | 0 | 5124 | 4978 | 1 | 5115051 | 49,24 | 84  | ST-448   |
| 47241 | Escherichia coli MS 146-1 | draft | 355 | 0  | 0 | 4953 | 4516 | 0 | 4740105 | 49,27 | 61  | ST-34    |
| 47257 | Escherichia coli MS 153-1 | draft | 507 | 0  | 0 | 5465 | 4878 | 1 | 5087744 | 49,52 | 64  | ST-73    |
| 47259 | Escherichia coli MS 16-3  | draft | 451 | 0  | 0 | 5289 | 4743 | 1 | 4952805 | 49,46 | 58  | ST-978   |
| 47263 | Escherichia coli MS 175-1 | draft | 413 | 0  | 0 | 4866 | 4429 | 1 | 4673288 | 49,30 | 63  | ST-167   |
| 47265 | Escherichia coli MS 182-1 | draft | 456 | 0  | 0 | 5315 | 4849 | 1 | 4982225 | 49,46 | 67  | ST-453   |
| 47267 | Escherichia coli MS 185-1 | draft | 378 | 0  | 0 | 5160 | 4659 | 0 | 4939390 | 49,38 | 56  | ST-73    |
| 47269 | Escherichia coli MS 187-1 | draft | 310 | 0  | 0 | 4453 | 4112 | 1 | 4384173 | 49,18 | 64  | ST-93    |
| 47271 | Escherichia coli MS 196-1 | draft | 785 | 0  | 0 | 5586 | 5233 | 1 | 5214638 | 49,34 | 70  | ST-10    |
| 47273 | Escherichia coli MS 198-1 | draft | 564 | 0  | 0 | 5604 | 5105 | 1 | 5236490 | 49,33 | 64  | ST-69    |
| 47275 | Escherichia coli MS 200-1 | draft | 445 | 0  | 0 | 5342 | 4765 | 0 | 5042708 | 49,51 | 56  | ST-127   |
| 47205 | Escherichia coli MS 21-1  | draft | 540 | 0  | 0 | 5742 | 5259 | 1 | 5282923 | 49,61 | 67  | ST-59    |
| 47207 | Escherichia coli MS 45-1  | draft | 396 | 0  | 0 | 5233 | 4702 | 1 | 4994869 | 49,59 | 62  | ST-73    |

|       |                                      |       |      |   |   |      |      |    |         |       |     |         |
|-------|--------------------------------------|-------|------|---|---|------|------|----|---------|-------|-----|---------|
| 47209 | Escherichia coli MS 57-2             | draft | 408  | 0 | 0 | 5225 | 4767 | 1  | 4938310 | 49,30 | 63  | ST-420* |
| 47211 | Escherichia coli MS 60-1             | draft | 464  | 0 | 0 | 5645 | 5025 | 0  | 5196275 | 49,49 | 65  | ST-127  |
| 47213 | Escherichia coli MS 69-1             | draft | 425  | 0 | 0 | 5426 | 4952 | 1  | 5207549 | 49,62 | 63  | ST-68*  |
| 47217 | Escherichia coli MS 78-1             | draft | 410  | 0 | 0 | 4990 | 4536 | 1  | 4752681 | 49,37 | 60  | ST-86   |
| 40701 | Escherichia coli MS 79-10            | draft | 157  | 1 | 0 | 0    | 4719 | 1  | 4900086 | 49,41 | 75  | ST-101  |
| 47219 | Escherichia coli MS 84-1             | draft | 432  | 0 | 0 | 5709 | 5109 | 1  | 5287926 | 49,45 | 71  | ST-88   |
| 40699 | Escherichia coli MS 85-1             | draft | 234  | 0 | 0 | 5537 | 5345 | 1  | 5457657 | 49,38 | 85  | ST-88   |
| 47121 | Escherichia coli NC101               | draft | 27   | 0 | 0 | 4698 | 4660 | 1  | 5021144 | 49,43 | 71  | ST-998  |
| 60059 | Escherichia coli O157:H- str. 493-89 | draft | 204  | 0 | 0 | 4692 | 4864 | 1  | 5054824 | 49,47 | 82  | ST-11   |
| 60061 | Escherichia coli O157:H- str. H 2687 | draft | 209  | 0 | 0 | 4631 | 4864 | 1  | 5048194 | 49,46 | 83  | ST-587  |
| 61463 | Escherichia coli O157:H7 str. 1044   | draft | 70   | 1 | 0 | 5352 | 5329 | 2  | 5487708 | 49,57 | 90  | ST-11   |
| 61473 | Escherichia coli O157:H7 str. 1125   | draft | 57   | 1 | 0 | 5449 | 5393 | 3  | 5569621 | 49,68 | 99  | ST-11   |
| 61465 | Escherichia coli O157:H7 str. EC1212 | draft | 32   | 1 | 0 | 4914 | 5302 | 7  | 5510053 | 49,58 | 102 | ST-11   |
| 42809 | Escherichia coli O157:H7 str. EC4009 | draft | 277  | 0 | 0 | 0    | 5076 | 1  | 5194891 | 49,78 | 58  | ST-11   |
| 27747 | Escherichia coli O157:H7 str. EC4024 | draft | 364  | 0 | 0 | 0    | 6332 | 3  | 6199307 | 49,26 | 103 | ST-11   |
| 27737 | Escherichia coli O157:H7 str. EC4042 | draft | 3    | 0 | 1 | 1398 | 5488 | 7  | 5617728 | 49,54 | 107 | ST-11   |
| 27733 | Escherichia coli O157:H7 str. EC4045 | draft | 7    | 0 | 1 | 2548 | 5467 | 7  | 5634850 | 49,53 | 107 | ST-11   |
| 27745 | Escherichia coli O157:H7 str. EC4076 | draft | 135  | 0 | 0 | 4745 | 5613 | 10 | 5705645 | 49,44 | 109 | ST-11   |
| 42813 | Escherichia coli O157:H7 str. EC4084 | draft | 881  | 0 | 0 | 0    | 5705 | 1  | 5298036 | 49,78 | 68  | ST-11   |
| 27743 | Escherichia coli O157:H7 str. EC4113 | draft | 231  | 0 | 0 | 4735 | 5705 | 5  | 5655847 | 49,40 | 89  | ST-11   |
| 42815 | Escherichia coli O157:H7 str. EC4127 | draft | 791  | 0 | 0 | 0    | 5527 | 1  | 5296992 | 49,77 | 62  | ST-11   |
| 42817 | Escherichia coli O157:H7 str. EC4191 | draft | 267  | 0 | 0 | 0    | 5067 | 1  | 5201104 | 49,78 | 50  | ST-11   |
| 42811 | Escherichia coli O157:H7 str. EC4192 | draft | 958  | 0 | 0 | 0    | 5684 | 1  | 5349693 | 49,76 | 66  | ST-11*  |
| 27741 | Escherichia coli O157:H7 str. EC4196 | draft | 186  | 0 | 0 | 4596 | 5565 | 8  | 5620606 | 49,45 | 95  | ST-11   |
| 42819 | Escherichia coli O157:H7 str. EC4205 | draft | 1583 | 0 | 0 | 0    | 6490 | 1  | 5287055 | 49,79 | 68  | ST-11   |
| 27735 | Escherichia coli O157:H7 str. EC4206 | draft | 6    | 1 | 1 | 1084 | 5555 | 7  | 5629932 | 49,53 | 106 | ST-11   |
| 27749 | Escherichia coli O157:H7 str. EC4401 | draft | 186  | 0 | 0 | 4581 | 5701 | 8  | 5733133 | 49,54 | 95  | ST-11   |
| 27751 | Escherichia coli O157:H7 str. EC4486 | draft | 165  | 0 | 0 | 4954 | 5872 | 8  | 5933166 | 49,58 | 105 | ST-11   |
| 27753 | Escherichia coli O157:H7 str. EC4501 | draft | 250  | 0 | 0 | 4626 | 5715 | 5  | 5677181 | 49,42 | 74  | ST-11   |
| 27755 | Escherichia coli O157:H7 str. EC508  | draft | 272  | 0 | 0 | 4701 | 5640 | 7  | 5656666 | 49,35 | 82  | ST-11   |
| 42821 | Escherichia coli O157:H7 str. EC536  | draft | 678  | 0 | 0 | 0    | 5398 | 1  | 5262452 | 49,76 | 70  | ST-11   |

|       |                                               |       |      |     |   |      |       |    |          |       |     |          |
|-------|-----------------------------------------------|-------|------|-----|---|------|-------|----|----------|-------|-----|----------|
| 27757 | Escherichia coli O157:H7 str. EC869           | draft | 147  | 0   | 0 | 4761 | 5648  | 8  | 5731065  | 49,46 | 93  | ST-11    |
| 36543 | Escherichia coli O157:H7 str. FRIK2000        | draft | 247  | 5   | 0 | 0    | 5325  | 1  | 5408690  | 49,82 | 77  | ST-11    |
| 32275 | Escherichia coli O157:H7 str. FRIK966         | draft | 316  | 8   | 0 | 0    | 5343  | 1  | 5376914  | 49,76 | 76  | ST-11    |
| 60057 | Escherichia coli O157:H7 str. G5101           | draft | 216  | 0   | 0 | 4679 | 4780  | 1  | 4971794  | 49,36 | 85  | ST-11    |
| 60067 | Escherichia coli O157:H7 str. LSU-61          | draft | 189  | 0   | 0 | 4627 | 4820  | 1  | 5048276  | 49,39 | 86  | ST-11    |
| 28847 | Escherichia coli O157:H7 str. TW14588         | draft | 10   | 902 | 1 | 8972 | 10944 | 14 | 11249113 | 49,51 | 200 | ST-11    |
| 60063 | Escherichia coli O55:H7 str. 3256-97          | draft | 188  | 0   | 0 | 4684 | 4865  | 1  | 5083624  | 49,43 | 87  | ST-335   |
| 60065 | Escherichia coli O55:H7 str. USDA 5905        | draft | 154  | 0   | 0 | 4669 | 4877  | 1  | 5105283  | 49,51 | 88  | ST-335   |
| 41499 | Escherichia coli OP50                         | draft | 2939 | 0   | 0 | 0    | 6135  | 0  | 4418649  | 49,23 | 16  | Unknown* |
| 40279 | Escherichia coli RN587/1                      | draft | 73   | 1   | 0 | 4935 | 4919  | 7  | 5061577  | 49,39 | 85  | ST-725   |
| 48269 | Escherichia coli STEC_7v                      | draft | 29   | 1   | 0 | 5072 | 4875  | 8  | 5195834  | 49,59 | 103 | Unknown* |
| 51747 | Escherichia coli str. K-12 substr. MG1655star | draft | 52   | 0   | 0 | 0    | 4339  | 1  | 4607632  | 49,07 | 87  | ST-10    |
| 39063 | Escherichia coli TA007                        | draft | 232  | 8   | 0 | 5065 | 5277  | 1  | 5252119  | 49,50 | 70  | ST-93*   |
| 39079 | Escherichia coli TA143                        | draft | 168  | 4   | 0 | 0    | 4599  | 1  | 4829725  | 49,42 | 69  | ST-1884  |
| 39085 | Escherichia coli TA206                        | draft | 187  | 4   | 0 | 0    | 4902  | 1  | 5055289  | 49,47 | 62  | ST-1386  |
| 39091 | Escherichia coli TA271                        | draft | 191  | 7   | 0 | 0    | 4934  | 1  | 5020687  | 49,28 | 64  | ST-58    |
| 39093 | Escherichia coli TA280                        | draft | 168  | 5   | 0 | 0    | 5210  | 1  | 5258161  | 49,41 | 77  | Unknown* |
| 51133 | Escherichia coli TW07793                      | draft | 35   | 8   | 0 | 0    | 4383  | 6  | 4650895  | 49,33 | 84  | ST-1041  |
| 39103 | Escherichia coli TW10509                      | draft | 92   | 1   | 0 | 4878 | 5099  | 1  | 5353500  | 49,66 | 82  | ST-747   |
| 59743 | Escherichia coli TW10598                      | draft | 310  | 2   | 0 | 0    | 5269  | 4  | 5243318  | 49,39 | 89  | ST-4     |
| 59745 | Escherichia coli TW10722                      | draft | 405  | 11  | 0 | 0    | 5838  | 9  | 5689893  | 49,46 | 102 | ST-443   |
| 59747 | Escherichia coli TW10828                      | draft | 227  | 6   | 0 | 0    | 5181  | 5  | 5280267  | 49,36 | 90  | ST-173   |
| 59749 | Escherichia coli TW11681                      | draft | 153  | 5   | 0 | 0    | 5186  | 8  | 5305843  | 49,31 | 92  | ST-728*  |
| 59751 | Escherichia coli TW14425                      | draft | 155  | 1   | 0 | 0    | 5171  | 8  | 5210696  | 49,41 | 90  | ST-23    |
| 42709 | Escherichia coli W                            | draft | 88   | 250 | 0 | 4268 | 4716  | 1  | 4941083  | 49,22 | 68  | ST-1079  |
| 61477 | Escherichia coli WV_060327                    | draft | 28   | 0   | 0 | 4434 | 4424  | 3  | 4681497  | 49,38 | 82  | ST-35*   |
| 60773 | Shigella boydii ATCC 9905                     | draft | 110  | 0   | 0 | 5125 | 5379  | 2  | 5129830  | 49,34 | 84  | ST-1749  |
| 16194 | Shigella dysenteriae 1012                     | draft | 189  | 0   | 0 | 4019 | 5499  | 3  | 5235535  | 49,44 | 72  | ST-288   |
| 48263 | Shigella dysenteriae 1617                     | draft | 67   | 0   | 0 | 5833 | 5348  | 7  | 4613557  | 48,81 | 85  | ST-146   |
| 60771 | Shigella dysenteriae CDC 74-1112              | draft | 242  | 13  | 0 | 4644 | 4921  | 1  | 4596141  | 48,92 | 80  | ST-252   |
| 48255 | Shigella flexneri 2a str. 2457T               | draft | 71   | 4   | 0 | 5233 | 5029  | 6  | 4825496  | 49,26 | 105 | ST-245   |

|       |                              |       |     |   |   |      |      |   |         |       |    |        |
|-------|------------------------------|-------|-----|---|---|------|------|---|---------|-------|----|--------|
| 60775 | Shigella flexneri CDC 796-83 | draft | 209 | 1 | 0 | 4811 | 4960 | 2 | 4682763 | 49,10 | 87 | ST-145 |
| 48265 | Shigella sonnei 53G          | draft | 150 | 5 | 0 | 5756 | 5636 | 7 | 5185984 | 49,26 | 96 | ST-152 |
