# Supplementary material for: Estimating variation within the genes and inferring the phylogeny of 186 sequenced diverse Escherichia coli genomes
Source: Springer Nature journal article supplement (doi:10.1186/1471-2164-13-577), 2012-01-01
Supplement: 12864_2012_4742_MOESM1_ESM.pdf [file 12864_2012_4742_MOESM1_ESM.pdf]

**Mark Achtman's MLST scheme:**

adk  
fumC  
gyrB  
icd  
mdh  
purA  
recA

**Institute Pasteur's MLST scheme:**

dinB  
icd  
pabB  
polB  
putP  
trpA  
trpB  
uidA

**T. Whittam's MLST scheme:**

arcA  
aroE  
aspC  
clpX  
cyaA  
dnaG  
fadD  
grpE  
icdA  
lysP  
mdh  
mtlD  
mutS  
rpoS  
uidA
