# Supplementary material for: Estimating variation within the genes and inferring the phylogeny of 186 sequenced diverse Escherichia coli genomes
Source: Springer Nature journal article supplement (doi:10.1186/1471-2164-13-577), 2012-01-01

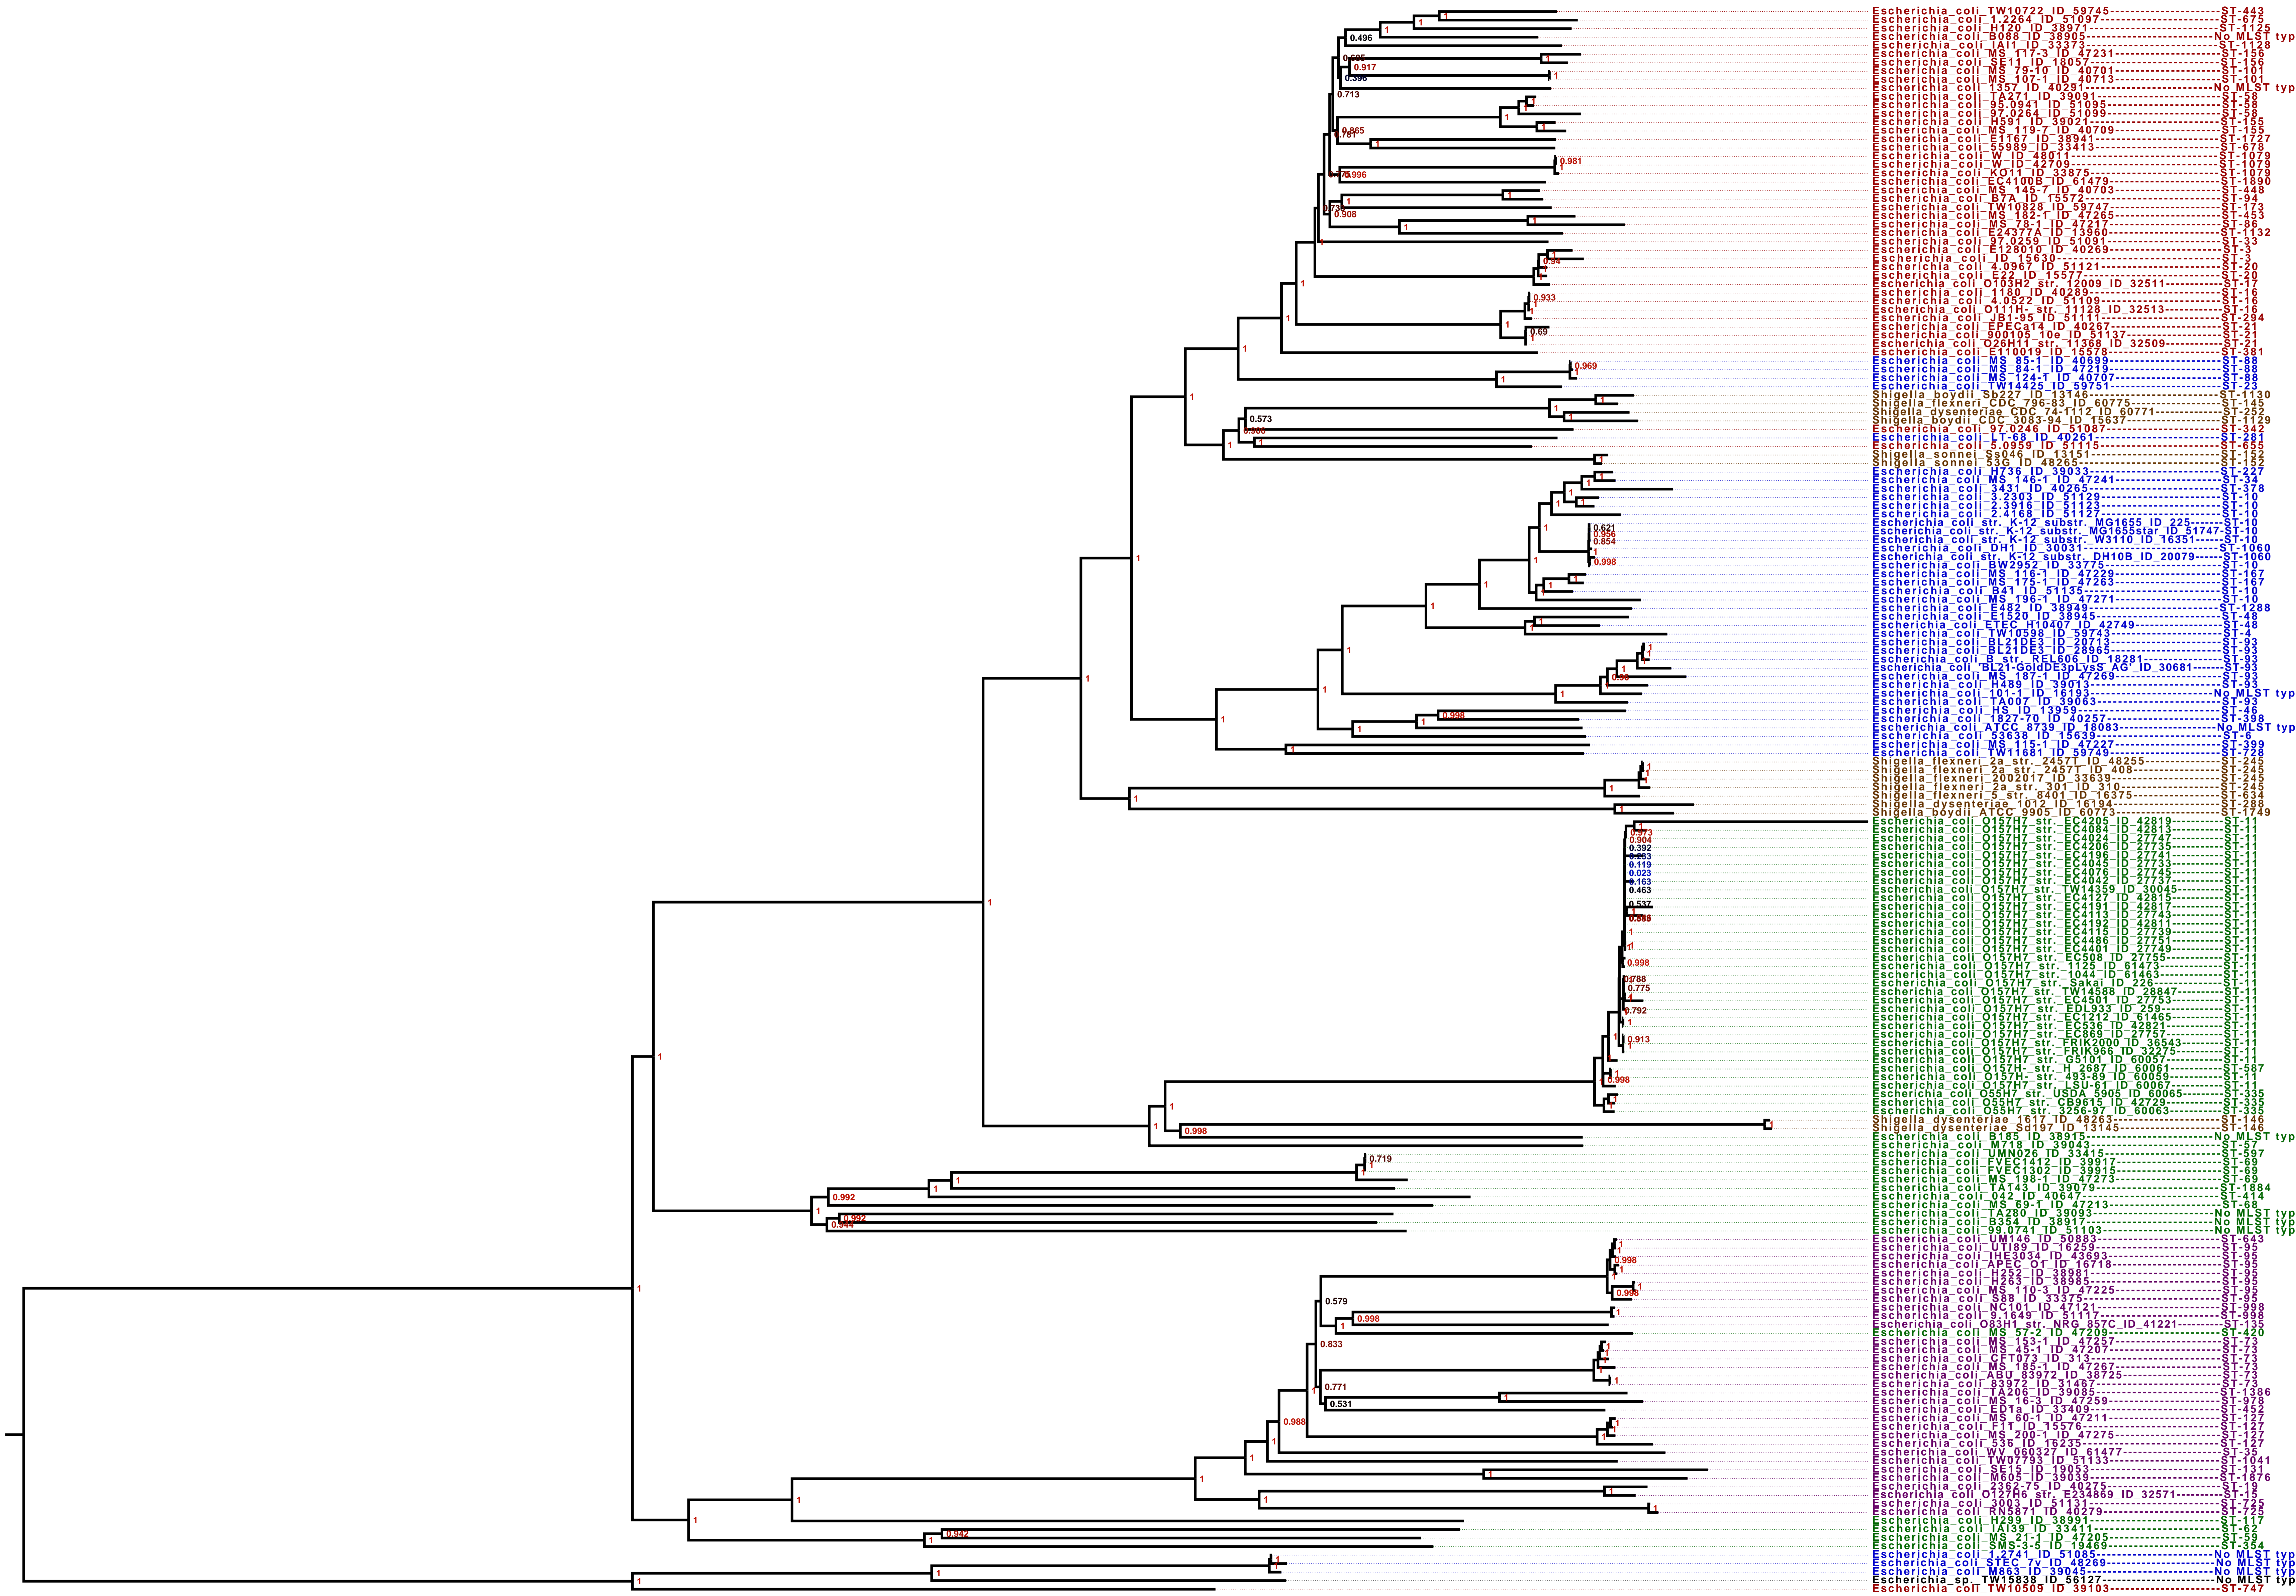

Supplement: 12864_2012_4742_MOESM3_ESM.pdf [file 12864_2012_4742_MOESM3_ESM.pdf]
