# Supplementary material for: Estimating variation within the genes and inferring the phylogeny of 186 sequenced diverse Escherichia coli genomes
Source: Springer Nature journal article supplement (doi:10.1186/1471-2164-13-577), 2012-01-01
Supplement: 12864_2012_4742_MOESM5_ESM.pdf [file 12864_2012_4742_MOESM5_ESM.pdf]

| <b>Std. dev.</b> | <b>Avg. size</b> | <b>Seqs in HGC</b> | <b>Gene / product</b>                        |
|------------------|------------------|--------------------|----------------------------------------------|
| 4696             | 13604            | 53                 | Adhesin for cattle intestine colonization    |
| 3574             | 5096             | 20                 | putative invasins                            |
| 3468             | 7125             | 29                 | probable hemagglutinin-related protein       |
| 3456             | 5983             | 47                 | ToxB (plasmid)                               |
| 2982             | 6444             | 53                 | Stx1 converting phage                        |
| 2889             | 7356             | 25                 | Efa1/LifA-like protein                       |
| 2776             | 7159             | 5                  | putative haemolysin/haemagglutinin           |
| 2686             | 4478             | 198                | Adhesin                                      |
| 2668             | 4528             | 9                  | Efa1/LifA-like protein(Genomic island)       |
| 2501             | 8081             | 59                 | yersiniabactin biosynthetic protein          |
| 2458             | 4312             | 11                 | defense against restriction protein          |
| 2427             | 6606             | 56                 | RatA-like protein                            |
| 2334             | 8527             | 19                 | putative peptide/polyketide synthase         |
| 2298             | 4047             | 7                  | hypothetical protein (K. pneumoniae plasmid) |
| 2105             | 2842             | 3                  | ycbB. Possible Adhesin (plasmid)             |
| 2044             | 2443             | 4                  | Adhesin                                      |
