# Supplementary figures and images for: Estimating variation within the genes and inferring the phylogeny of 186 sequenced diverse Escherichia coli genomes
Source: Springer Nature journal article supplement (doi:10.1186/1471-2164-13-577), 2012-01-01

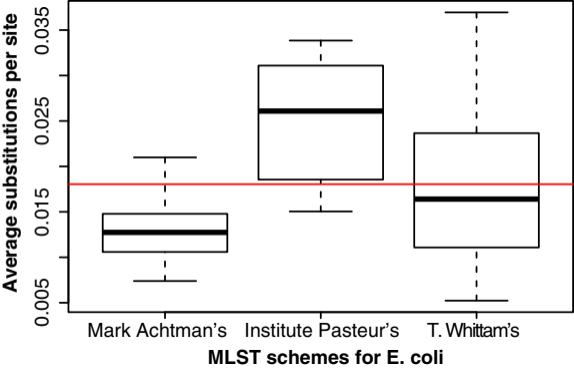

Supplement: 12864_2012_4742_MOESM10_ESM.pdf [file 12864_2012_4742_MOESM10_ESM.pdf]

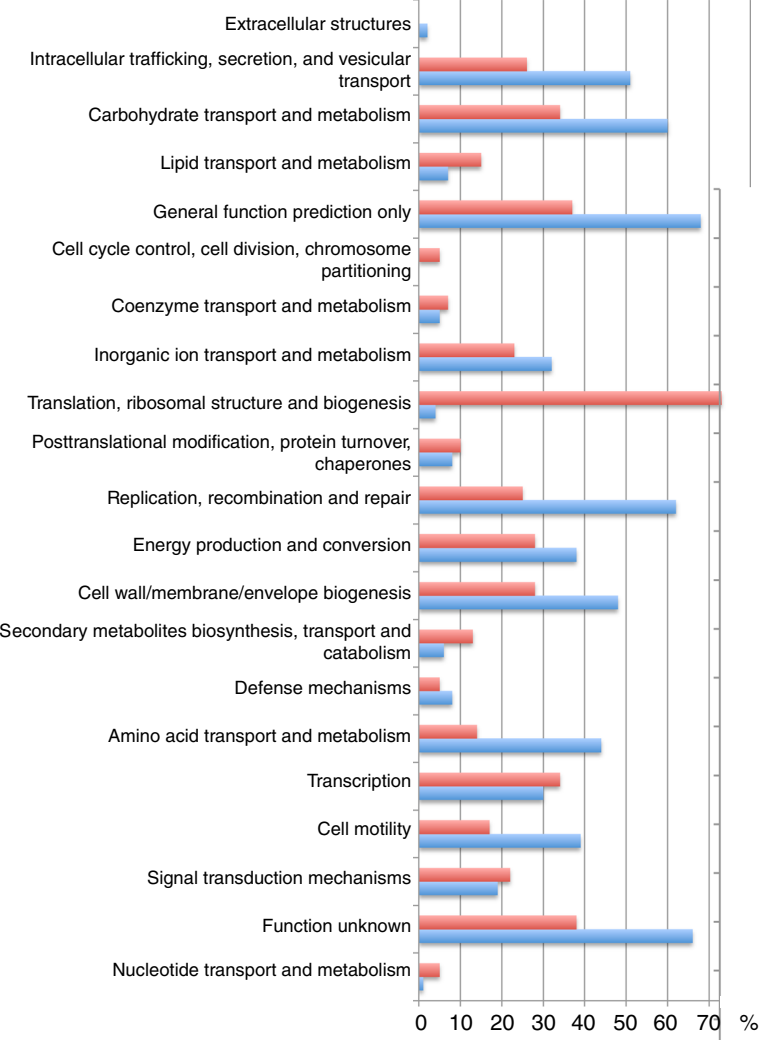

Supplement: 12864_2012_4742_MOESM12_ESM.pdf [file 12864_2012_4742_MOESM12_ESM.pdf]

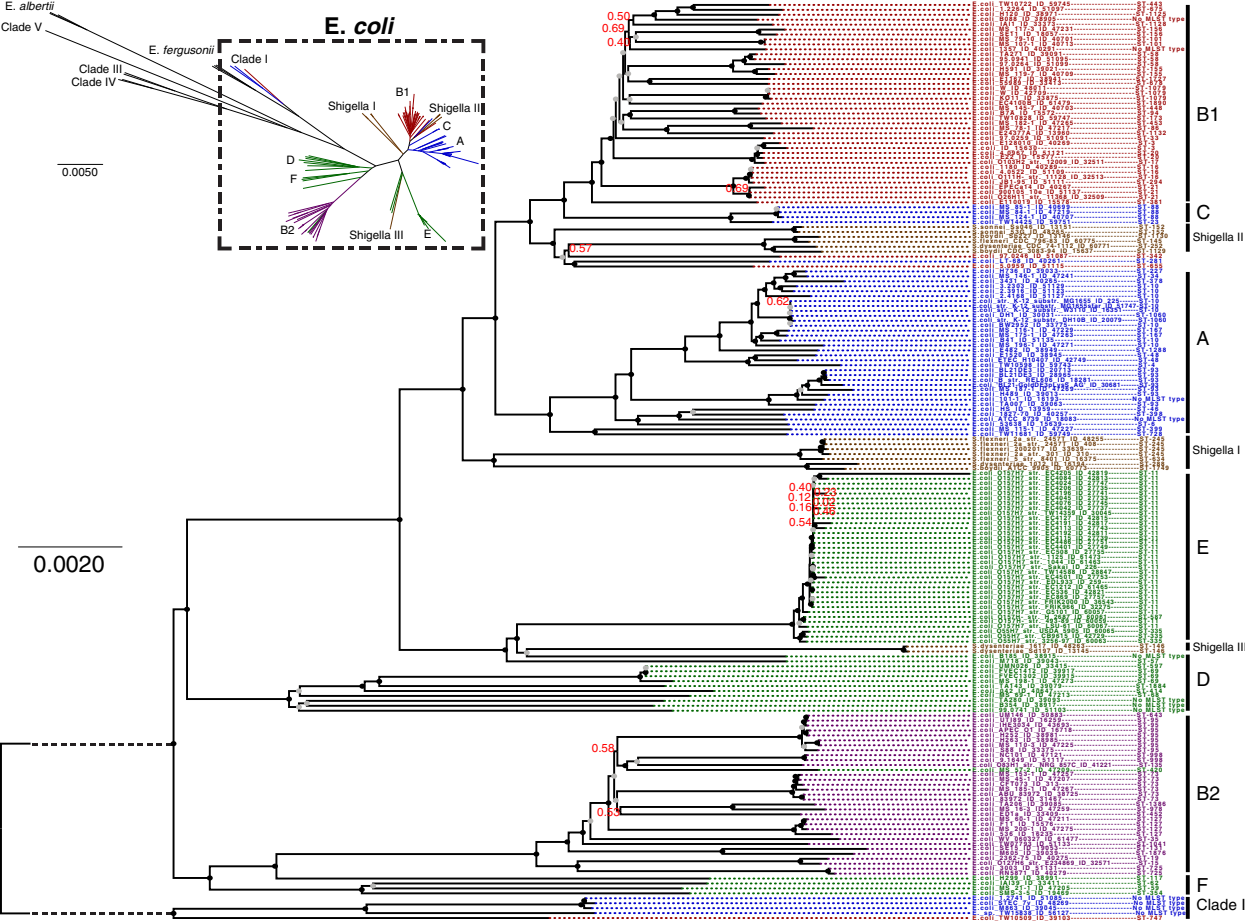

Supplement: 12864_2012_4742_MOESM13_ESM.pdf [file 12864_2012_4742_MOESM13_ESM.pdf]

# Homolog Gene Clusters

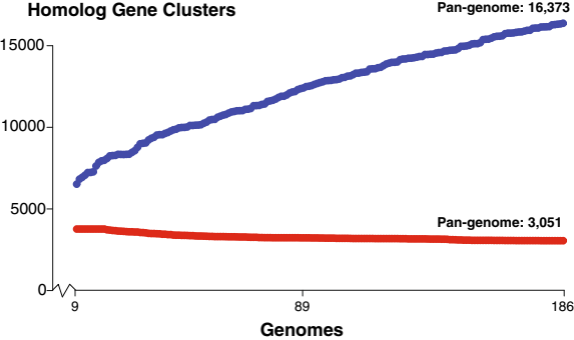

Pan-genome: 16,373

Pan-genome: 3,051

Genomes

Supplement: 12864_2012_4742_MOESM8_ESM.pdf [file 12864_2012_4742_MOESM8_ESM.pdf]

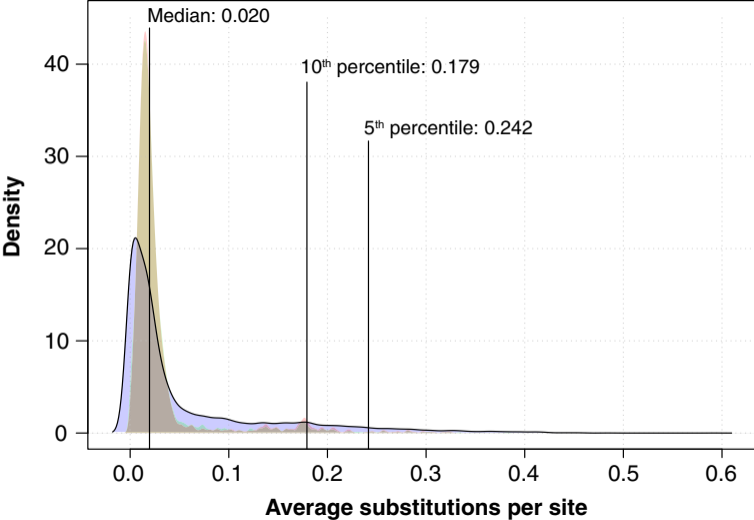

Supplement: 12864_2012_4742_MOESM9_ESM.pdf [file 12864_2012_4742_MOESM9_ESM.pdf]
